# Supplementary material for: Androgen Maintains Intestinal Homeostasis by Inhibiting BMP Signaling via Intestinal Stromal Cells
Source: PubMed Central journal article supplement (PMC7561494; doi:10.1016/j.stemcr.2020.08.001), 2020-09-10
Supplement: mmc1.pdf [file mmc1.pdf]

**Stem Cell Reports, Volume 15**

**Supplemental Information**

**Androgen Maintains Intestinal Homeostasis by Inhibiting BMP Signaling via Intestinal Stromal Cells**

**Xin Yu, Shiguang Li, Yiming Xu, Yundi Zhang, Wenlong Ma, Changchun Liang, Haodong Lu, Yuge Ji, Chuanyong Liu, Dawei Chen, and Jingxin Li**

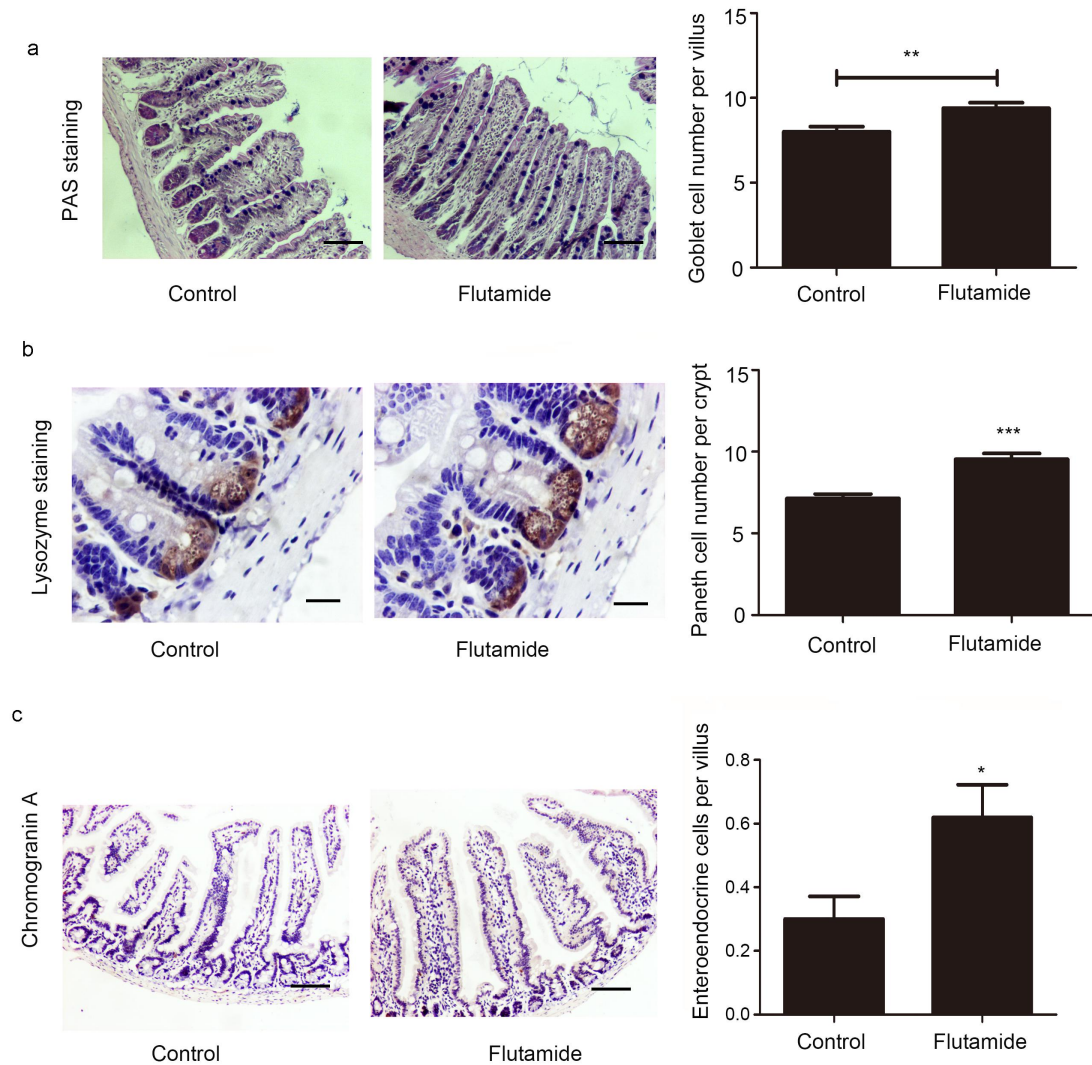

Fig.S1. Inhibition of AR model was constructed to analyze the change of three secretory lineages. Data, indicated as mean  $\pm$  SD, correspond to three independent experiments (n=5 mice/group/experiment). (a) For the goblet cells count per villus in inhibition of AR model PAS staining was performed. Scale bar, 100 $\mu$ m. (b) For the Paneth cells count per crypt in inhibition of AR model, IHC was performed with primary antibody to lysozyme. Scale bar, 50 $\mu$ m, (c) For the enteroendocrine cells count per villus in the inhibition of AR model, IHC was performed with the primary antibody to chromogranin A. Scale bar, 100 $\mu$ m.

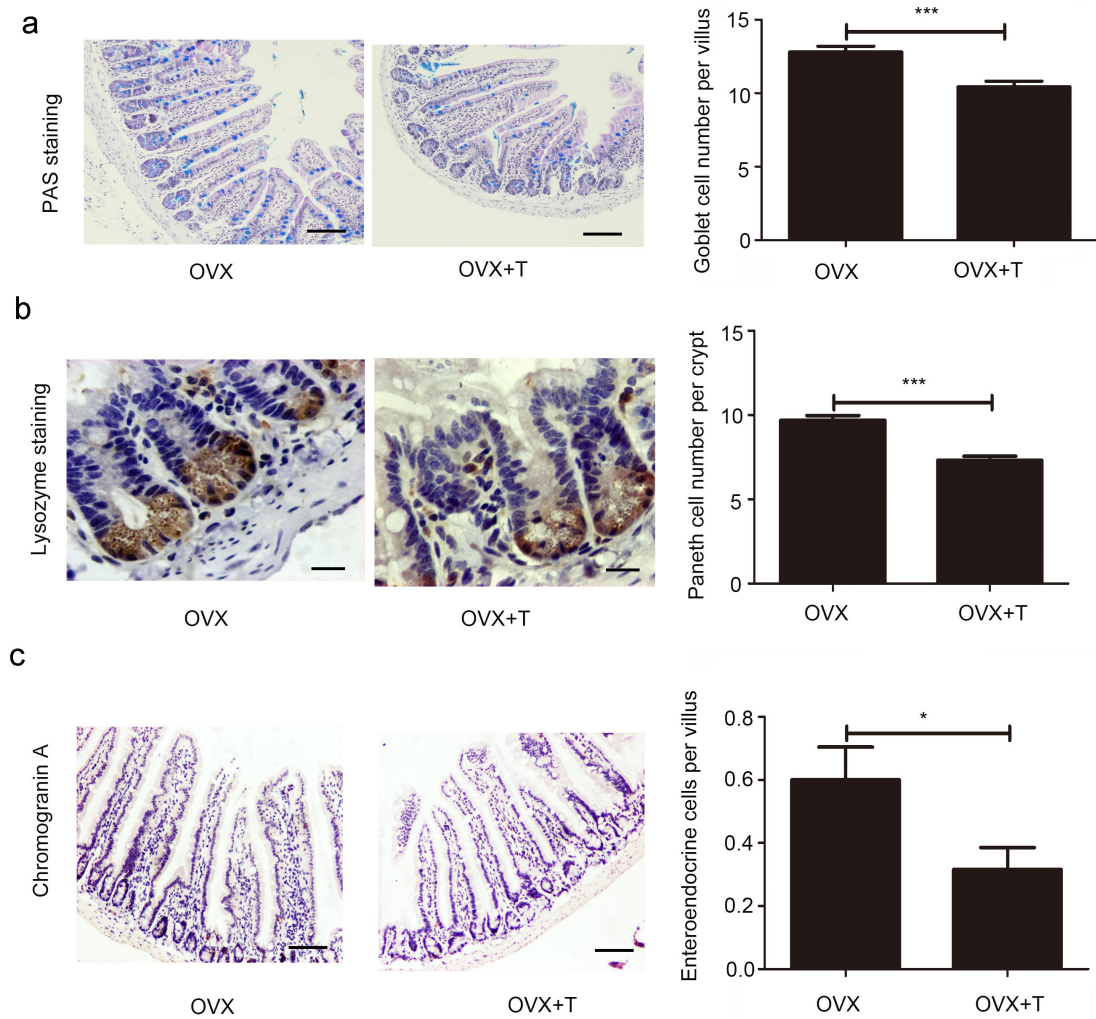

Fig.S2. OVX model was constructed to analyze the change of three secretory lineages. Data, indicated as mean  $\pm$  SD, correspond to three independent experiments (n=6 mice/group/experiment). (a) For the goblet cells count per villus in OVX model, PAS staining was performed. Scale bar,100 $\mu$ m. (b) For the Paneth cells count per crypt in OVX model, IHC was performed with primary antibody to lysozyme. Scale bar, 50 $\mu$ m. (c) For the enteroendocrine cells count per villus in the OVX model, IHC was performed with the primary antibody to chromogranin A. Scale bar, 100 $\mu$ m.

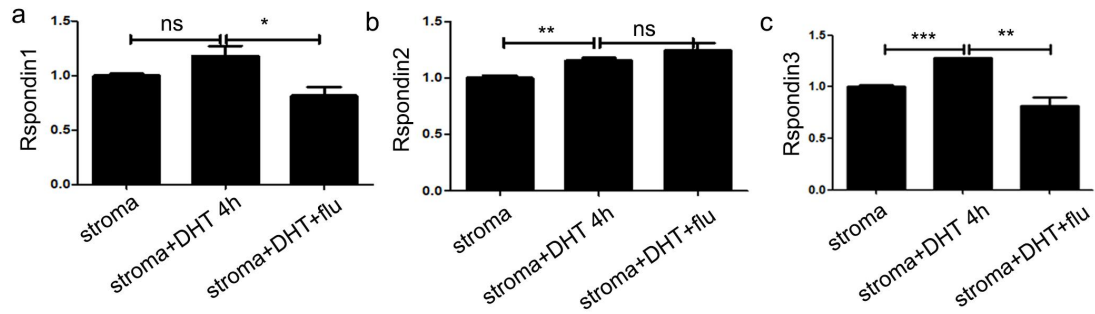

Fig.S3. Indicated mRNAs were analyzed by qRT-PCR. Data, indicated as mean  $\pm$  SD, correspond to three independent experiments (n=4 mice/group/experiment). (a)*Rspol1*, (b)*Rspo2*, (c)*Rspo3*. ns means no significance. \*P < 0.05, \*\*P < 0.01, and \*\*\*P < 0.001

Table S1 Primer sequences of the analyzed genes

|                | forward                | reverse                  |
|----------------|------------------------|--------------------------|
| <i>Ar</i>      | GGTCTTCTGGGGTGGAAAGT   | GGGACCTTGGATGGAGAACT     |
| <i>Gadph</i>   | TGTGTCCGTCGTGGATCTGA   | TTGCTGTTGAAGTCGCAGGAG    |
| <i>Chga</i>    | ATCCTCTCTATCCTGCGACAC  | GGGCTCTGGTTCTCAAACACT    |
| <i>Angptl2</i> | AAGCCATCAGGTAAGTCCTTTG | CCAGAGGATTGCCAGAGGATTA   |
| <i>Chrd</i>    | CCCATCCGTTCCGAGAAGG    | ACTGAGGTTTGTATGTTCTTGCAG |
| <i>Sfrp1</i>   | CAACGTGGGCTACAAGAAGAT  | GGCCAGTAGAAGCCGAAGAAC    |
| <i>Dkk2</i>    | CTGATGCGGGTCAAGGATTCA  | CTCCCCTCCTAGAGAGGACTT    |
| <i>Dkk3</i>    | CTCGGGGGTATTTTGCTGTGT  | TCCTCCTGAGGGTAGTTGAGA    |
| <i>Mmp7</i>    | CTGCCACTGTCCCAGGAAG    | GGGAGAGTTTTCCAGTCATGG    |
| <i>Hes1</i>    | GATAGCTCCCGGCATTCCAAG  | GCGCGGTATTTCCCAACA       |
| <i>Wnt5a</i>   | CAACTGGCAGGACTTTCTCAA  | CATCTCCGATGCCGGAAC       |
| <i>Wnt5b</i>   | CTGCTGACTGACGCCAACT    | CCTGATACAACGACACAGCTTT   |
| <i>Wnt4</i>    | AGACGTGCGAGAACTCAAAG   | GGAAGTGGTATTGGCACTCCT    |
| <i>Wnt2b</i>   | CCGACGTGTCCCCATCTTC    | GCCCCTATGTACCACCAGGA     |
| <i>Id3</i>     | CGACCGAGGAGCCTCTTAG    | GGACGCGATAGGGAAGACC      |
| <i>Id2</i>     | GGTCTTCCTCCTACGAGCAG   | CGATGGGCTTTAAGAGTGACAG   |
| <i>Msx2</i>    | TTCACCACATCCCAGCTTCTA  | TTGCAGTCTTTTCGCCTTAGC    |
| <i>Cdkn1a</i>  | CCTGGTGATGTCCGACCTG    | CCATGAGCGCATCGCAATC      |
| <i>Cdkn2a</i>  | CGCAGGTTCTTGGTCACTGT   | TGTTACGAAAGCCAGAGCG      |
| <i>Cdkn2b</i>  | CCCTGCCACCCTTACCAGA    | CAGATACCTCGCAATGTCACG    |
| <i>Axin2</i>   | TGACTCTCCTTCCAGATCCCA  | TGCCACACTAGGCTGACA       |
| <i>Grem2</i>   | GGTAGCTGAAACACGGAAGAA  | TCTTGCACCAGTCACTCTTGA    |
| <i>Nog</i>     | GCCAGCACTATCTACACATCC  | GCGTCTCGTTCAGATCCTTCTC   |
| <i>Muc2</i>    | TTCGGCACGAGCAACTTTG    | GGCAGGACACCTTGTTCATTG    |
| <i>Bmp4</i>    | TTCCTGGTAACCGAATGCTGA  | CCTGAATCTCGGCGACTTTTT    |

|              |                                |                             |
|--------------|--------------------------------|-----------------------------|
| <i>Tgfb1</i> | CTCCCGTGGCTTCTAGTGC            | GCCTTAGTTTGGACAGGATCTG      |
| <i>Klf4</i>  | CACCATGGACCCGGGCGTGGCTGCCAGAAA | TTAGGCTGTTCTTTTCCGGGGCCACGA |
| <i>Elf3</i>  | TTCTGACTCCGGTGGAAGTGAT         | CCCTTCTTATAGTCAGGAAAGCCA    |
| <i>Sox9</i>  | AAGTCGGTGAAGAACGGACAA          | CAGCGCCTTGAAGATAGCATT       |
| <i>Ngn3</i>  | TCTCGCCTCTTCTGGCTTTC           | CGGCAGATTTGAATGAGGGC        |
| <i>Atoh1</i> | TATCCCGTCCTTCAACAACGA          | TGGTCATTTTTGCAGGAAGCT       |
